# Supplementary material
Source: PubMed Central journal article supplement (PMC3503167)
Supplement: 1216515109_pnas.201216515SI.pdf [file 1216515109_pnas.201216515SI.pdf]

# Supporting information

Goulet et al. 10.1073/pnas.1216515109

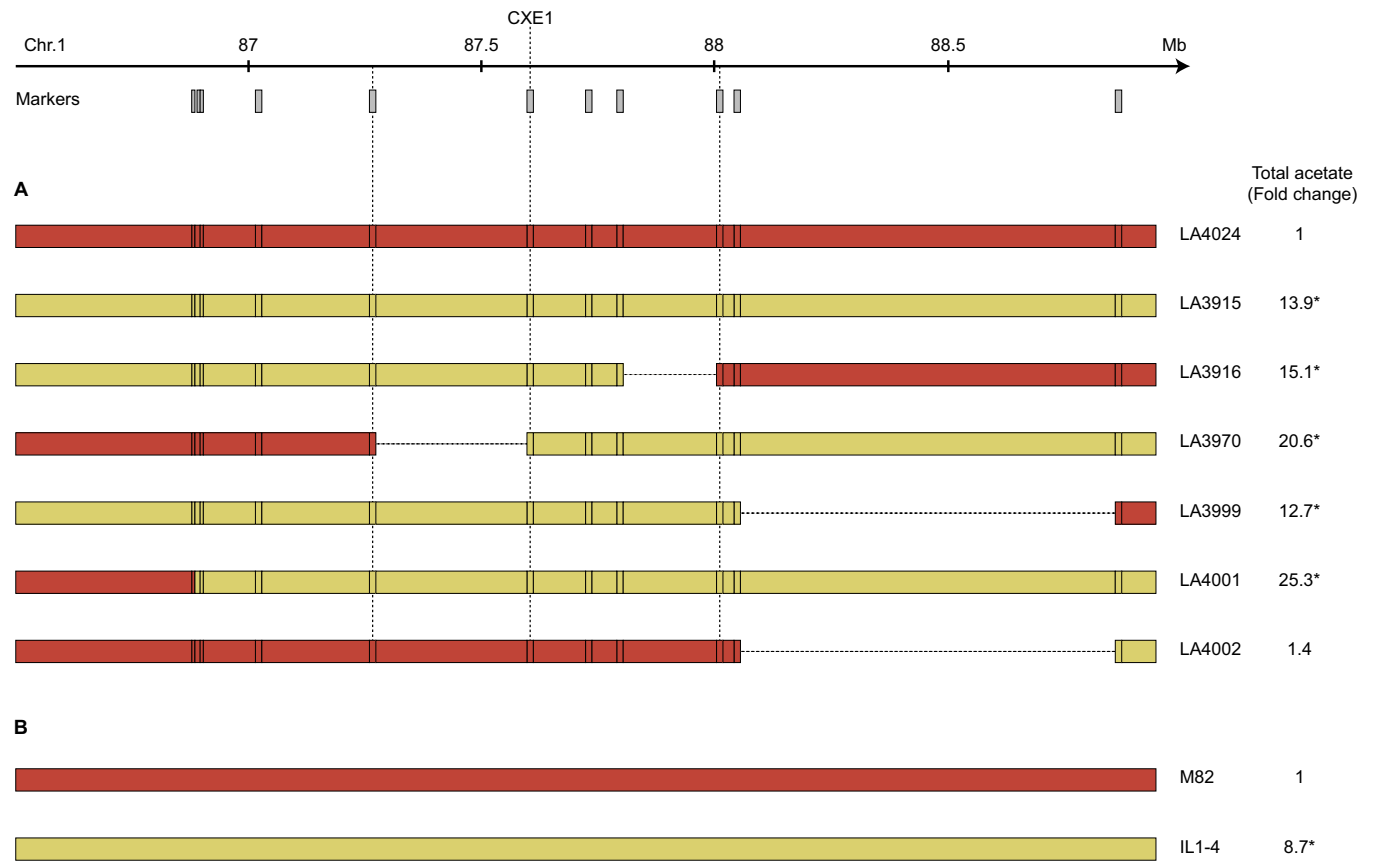

**Fig. S1.** Mapping of the quantitative trait loci on chromosome 1 for acetate esters. Genotypes of several introgression lines derived from the green-fruited parent *Solanum habrochaites* (A) or *S. pennellii* (B). Regions from the tomato parent are in red and those from the green-fruited species are in green. All of the lines that have the genotype of a green-fruited species at the *CxE1* position accumulate a high amount of acetate esters in the fruit. In addition to the illustrated lines, LA3929 (16.9\*-fold more acetate esters), LA3995 (9.3\*-fold more), and LA3998 (11.1\*-fold more) from the *S. habrochaites* population also have the green-fruited genotype in the *CxE1* region. \* $P < 0.05$ .





**Table S1. Correlation of acetate esters with consumer appreciation of tomato**

| Volatile              | Liking                              |          |
|-----------------------|-------------------------------------|----------|
|                       | Spearman's correlation coefficient* | P value  |
| Total acetate esters  | -0.511                              | 1.52E-06 |
| Propyl acetate        | -0.459                              | 1.88E-05 |
| Isobutyl acetate      | -0.450                              | 2.84E-05 |
| Butyl acetate         | -0.435                              | 5.54E-05 |
| 2-Methylbutyl acetate | -0.399                              | 2.47E-04 |
| sec-butyl acetate     | -0.393                              | 3.14E-04 |
| Hexyl acetate         | -0.348                              | 1.54E-03 |
| cis-3-hexenyl acetate | -0.299                              | 0.007    |
| 3-Methylbutyl acetate | -0.228                              | 0.042    |

\*Consumer preference and composition data were originally published in Tieman et al. (1). The correlation between consumer liking and volatile concentrations in 68 tomato varieties was performed on the 50 most abundant volatiles. Volatiles were expressed as a percentage of total volatile content.

1. Tieman D, et al. (2012) The chemical interactions underlying tomato flavor preferences. *Curr Biol* 22(11):1035–1039.

**Table S2. Content of several acetate esters relative to the total amount of volatiles in wild accessions of the tomato clade**

| Species/<br>accession no.  | Propyl acetate<br>content (%) ( $\pm$ SE) | Isobutyl acetate<br>content (%) ( $\pm$ SE) | 3-Methylbutyl<br>acetate content<br>(%) ( $\pm$ SE) | 2-Methylbutyl<br>acetate content<br>(%) ( $\pm$ SE) | cis-3-Hexenyl<br>acetate content<br>(%) ( $\pm$ SE) |
|----------------------------|-------------------------------------------|---------------------------------------------|-----------------------------------------------------|-----------------------------------------------------|-----------------------------------------------------|
| <i>S. lycopersicum</i>     |                                           |                                             |                                                     |                                                     |                                                     |
| LA1207                     | 0.011 $\pm$ 0.003                         | 0.094 $\pm$ 0.026                           | 0.004 $\pm$ 0.002                                   | 0.037 $\pm$ 0.008                                   | 0.119 $\pm$ 0.021                                   |
| LA1287                     | 0.034 $\pm$ 0.007                         | 0.097 $\pm$ 0.012                           | 0.024 $\pm$ 0.010                                   | 0.093 $\pm$ 0.027                                   | 0.298 $\pm$ 0.0480                                  |
| LA1456                     | 0.027 $\pm$ 0.006                         | 0.103 $\pm$ 0.009                           | 0.015 $\pm$ 0.006                                   | 0.088 $\pm$ 0.0270                                  | 0.248 $\pm$ 0.036                                   |
| LA1621                     | 0.036 $\pm$ 0.012                         | 0.132 $\pm$ 0.020                           | 0.009 $\pm$ 0.004                                   | 0.144 $\pm$ 0.040                                   | 0.202 $\pm$ 0.043                                   |
| LA1703                     | 0.007 $\pm$ 0.001                         | 0.156 $\pm$ 0.017                           | 0.004 $\pm$ 0.002                                   | 0.047 $\pm$ 0.006                                   | 0.055 $\pm$ 0.005                                   |
| LA1705                     | 0.026 $\pm$ 0.011                         | 0.086 $\pm$ 0.019                           | 0.027 $\pm$ 0.006                                   | 0.049 $\pm$ 0.016                                   | 0.257 $\pm$ 0.0384                                  |
| <i>S. pimpinellifolium</i> |                                           |                                             |                                                     |                                                     |                                                     |
| LA0373                     | 0.010 $\pm$ 0.001                         | 0.135 $\pm$ 0.011                           | 0.001 $\pm$ 0.001                                   | 0.013 $\pm$ 0.001                                   | 0.162 $\pm$ 0.0248                                  |
| LA3158                     | 0.003 $\pm$ 0.001                         | 0.067 $\pm$ 0.013                           | 0.004 $\pm$ 0.004                                   | 0.009 $\pm$ 0.001                                   | 0.098 $\pm$ 0.012                                   |
| LA3159                     | 0.004 $\pm$ 0.000                         | 0.049 $\pm$ 0.015                           | 0.000 $\pm$ 0.000                                   | 0.018 $\pm$ 0.002                                   | 0.173 $\pm$ 0.0279                                  |
| LA3160                     | 0.004 $\pm$ 0.001                         | 0.072 $\pm$ 0.012                           | 0.000 $\pm$ 0.000                                   | 0.013 $\pm$ 0.004                                   | 0.111 $\pm$ 0.017                                   |
| LA3161                     | 0.003 $\pm$ 0.000                         | 0.066 $\pm$ 0.008                           | 0.000 $\pm$ 0.000                                   | 0.009 $\pm$ 0.002                                   | 0.107 $\pm$ 0.013                                   |
| <i>S. cheesmaniae</i>      |                                           |                                             |                                                     |                                                     |                                                     |
| LA0422                     | 0.936 $\pm$ 0.092                         | 0.243 $\pm$ 0.026                           | 0.019 $\pm$ 0.002                                   | 0.202 $\pm$ 0.030                                   | 0.481 $\pm$ 0.039                                   |
| LA0428                     | 0.006 $\pm$ 0.001                         | 0.059 $\pm$ 0.005                           | 0.002 $\pm$ 0.001                                   | 0.061 $\pm$ 0.023                                   | 0.370 $\pm$ 0.086                                   |
| LA1412                     | 0.689 $\pm$ 0.192                         | 0.368 $\pm$ 0.037                           | 0.480 $\pm$ 0.165                                   | 0.274 $\pm$ 0.076                                   | 0.456 $\pm$ 0.121                                   |
| <i>S. galapagense</i>      |                                           |                                             |                                                     |                                                     |                                                     |
| LA0483                     | 1.416 $\pm$ 0.080                         | 0.807 $\pm$ 0.107                           | 0.399 $\pm$ 0.090                                   | 0.612 $\pm$ 0.062                                   | 0.769 $\pm$ 0.215                                   |
| <i>S. neorickii</i>        |                                           |                                             |                                                     |                                                     |                                                     |
| LA0247                     | 1.872 $\pm$ 0.714                         | 0.948 $\pm$ 0.280                           | 0.144 $\pm$ 0.057                                   | 0.781 $\pm$ 0.241                                   | 0.434 $\pm$ 0.081                                   |
| LA2200                     | 0.333 $\pm$ 0.061                         | 0.190 $\pm$ 0.019                           | 0.032 $\pm$ 0.009                                   | 0.154 $\pm$ 0.020                                   | 0.285 $\pm$ 0.072                                   |
| <i>S. chmielewskii</i>     |                                           |                                             |                                                     |                                                     |                                                     |
| LA1028                     | 2.197 $\pm$ 0.658                         | 1.620 $\pm$ 0.360                           | 0.050 $\pm$ 0.008                                   | 0.783 $\pm$ 0.199                                   | 0.401 $\pm$ 0.067                                   |
| LA1306                     | 1.306 $\pm$ 0.614                         | 1.930 $\pm$ 0.351                           | 0.034 $\pm$ 0.034                                   | 0.448 $\pm$ 0.197                                   | 2.386 $\pm$ 1.304                                   |
| <i>S. pennellii</i>        |                                           |                                             |                                                     |                                                     |                                                     |
| LA0716                     | 0.996 $\pm$ 0.069                         | 2.750 $\pm$ 0.351                           | 7.525 $\pm$ 1.568*                                  |                                                     | 0.912 $\pm$ 0.046                                   |
| LA2560                     | 0.242 $\pm$ 0.050                         | 0.848 $\pm$ 0.066                           | 52.119 $\pm$ 5.992*                                 |                                                     | 0.924 $\pm$ 0.147                                   |

\*High abundance and close retention time prevent an efficient separation of 3-Methylbutyl acetate and 2-Methylbutyl acetate.

**Table S3. Transcript abundance of the different carboxylesterases in *S. lycopersicum*, *S. pennellii*, and IL 1–4**

|                              | CXE1 (copy no./ $\mu\text{g}$ of RNA) ( $\pm\text{SE}$ ) | CXE2 (copy no./ $\mu\text{g}$ of RNA) ( $\pm\text{SE}$ ) | CXE3 (copy no./ $\mu\text{g}$ of RNA) ( $\pm\text{SE}$ ) | CXE4 (copy no./ $\mu\text{g}$ of RNA) ( $\pm\text{SE}$ ) | CXE5 (copy no./ $\mu\text{g}$ of RNA) ( $\pm\text{SE}$ ) |
|------------------------------|----------------------------------------------------------|----------------------------------------------------------|----------------------------------------------------------|----------------------------------------------------------|----------------------------------------------------------|
| <i>S. lycopersicum</i> (M82) | 6,547,392 $\pm$ 660,852                                  | 993 $\pm$ 22                                             | 16 $\pm$ 6                                               | 64 $\pm$ 9                                               | 18,788 $\pm$ 760                                         |
| IL 1–4                       | 732,017 $\pm$ 112,662                                    | 2,904 $\pm$ 21                                           | 5,741 $\pm$ 654                                          | 882 $\pm$ 80                                             | 11,384 $\pm$ 999                                         |
| <i>S. pennellii</i> (LA0716) | 15,602 $\pm$ 6,242                                       | 1,518 $\pm$ 536                                          | 2,697 $\pm$ 947                                          | 2,909 $\pm$ 1095                                         | 4,140 $\pm$ 1,374                                        |

**Table S4. Transcript abundance of the different carboxylesterases in the transgenics lines**

|                      | CXE1 (copy no./ $\mu\text{g}$ of RNA) ( $\pm\text{SE}$ ) | CXE2 (copy no./ $\mu\text{g}$ of RNA) ( $\pm\text{SE}$ ) | CXE3 (copy no./ $\mu\text{g}$ of RNA) ( $\pm\text{SE}$ ) | CXE4 (copy no./ $\mu\text{g}$ of RNA) ( $\pm\text{SE}$ ) | CXE5 (copy no./ $\mu\text{g}$ of RNA) ( $\pm\text{SE}$ ) |
|----------------------|----------------------------------------------------------|----------------------------------------------------------|----------------------------------------------------------|----------------------------------------------------------|----------------------------------------------------------|
| Flora-Dade (control) | 5,984,902 $\pm$ 660,094                                  | 1,620 $\pm$ 337                                          | 55 $\pm$ 20                                              | 365 $\pm$ 72                                             | 43,013 $\pm$ 7071                                        |
| Line #3              | 92,300 $\pm$ 22,835                                      | 230 $\pm$ 20                                             | 18 $\pm$ 4                                               | 53 $\pm$ 10                                              | 4,655 $\pm$ 546                                          |
| Line #6              | 360,762 $\pm$ 52,380                                     | 649 $\pm$ 109                                            | 52 $\pm$ 17                                              | 246 $\pm$ 33                                             | 9,803 $\pm$ 843                                          |
| Line #180            | 9,302 $\pm$ 1,305                                        | 118 $\pm$ 8                                              | 6 $\pm$ 1                                                | 13 $\pm$ 5                                               | 1,713 $\pm$ 285                                          |

**Table S5. Enzymatic activity of SICXE1, SICXE5, and SICXE1del**

| Volatile                      | $K_m$ (mM) ( $\pm\text{SE}$ ) |                  |                  | $k_{\text{cat}}$ ( $\text{s}^{-1}$ ) ( $\pm\text{SE}$ ) |                  |                 | $k_{\text{cat}}/K_m$ |           |        |
|-------------------------------|-------------------------------|------------------|------------------|---------------------------------------------------------|------------------|-----------------|----------------------|-----------|--------|
|                               | SICXE1                        | SICXE1del        | SICXE5           | SICXE1                                                  | SICXE1del        | SICXE5          | SICXE1               | SICXE1del | SICXE5 |
| 2-Methylbutyl acetate         | 0.65 $\pm$ 0.05               | 2.12 $\pm$ 0.20  | 1.82 $\pm$ 0.65  | 84.89 $\pm$ 1.77                                        | 1.19 $\pm$ 0.01  | 1.34 $\pm$ 0.11 | 131.45               | 0.56      | 0.74   |
| 3-Methylbutyl acetate         | 0.62 $\pm$ 0.03               | 3.22 $\pm$ 0.36  | 3.89 $\pm$ 0.29  | 88.71 $\pm$ 0.68                                        | 1.17 $\pm$ 0.07  | 1.82 $\pm$ 0.20 | 144.24               | 0.36      | 0.47   |
| <i>cis</i> -3-hexenyl acetate | 0.47 $\pm$ 0.03               | 1.57 $\pm$ 0.15  | 3.38 $\pm$ 0.46  | 68.97 $\pm$ 0.56                                        | 3.05 $\pm$ 0.18  | 3.35 $\pm$ 0.22 | 145.60               | 1.95      | 0.99   |
| Hexyl acetate                 | 0.26 $\pm$ 0.04               | 1.45 $\pm$ 0.23  | 1.54 $\pm$ 0.63  | 65.05 $\pm$ 1.84                                        | 1.94 $\pm$ 0.12  | 2.94 $\pm$ 0.14 | 250.87               | 1.34      | 1.91   |
| Isobutyl acetate              | 0.95 $\pm$ 0.08               | 2.14 $\pm$ 0.18  | 6.69 $\pm$ 0.95  | 34.48 $\pm$ 0.40                                        | 0.40 $\pm$ 0.01  | 0.32 $\pm$ 0.03 | 36.19                | 0.19      | 0.05   |
| Butyl acetate                 | 1.29 $\pm$ 0.10               | 1.18 $\pm$ 0.39  | 4.79 $\pm$ 0.43  | 58.60 $\pm$ 0.48                                        | 0.73 $\pm$ 0.03  | 0.97 $\pm$ 0.07 | 45.57                | 0.62      | 0.20   |
| Pentyl acetate                | 0.40 $\pm$ 0.05               | 1.79 $\pm$ 0.16  | 3.02 $\pm$ 0.49  | 104.10 $\pm$ 0.55                                       | 1.92 $\pm$ 0.33  | 2.69 $\pm$ 0.09 | 261.75               | 1.08      | 0.89   |
| Propyl acetate                | 4.04 $\pm$ 0.27               | 6.75 $\pm$ 1.43  | 10.50 $\pm$ 4.34 | 17.59 $\pm$ 0.06                                        | 0.42 $\pm$ 0.04  | 0.66 $\pm$ 0.05 | 4.36                 | 0.06      | 0.06   |
| <i>sec</i> -butyl acetate     | 3.87 $\pm$ 0.64               | 12.75 $\pm$ 5.52 | 8.80 $\pm$ 3.47  | 10.54 $\pm$ 0.49                                        | 0.52 $\pm$ 0.07  | 0.17 $\pm$ 0.01 | 2.72                 | 0.04      | 0.02   |
| Phenyl ethyl acetate          | 0.22 $\pm$ 0.01               | 1.33 $\pm$ 0.07  | 3.48 $\pm$ 0.74  | 99.79 $\pm$ 1.86                                        | 10.67 $\pm$ 0.27 | 4.57 $\pm$ 0.12 | 453.58               | 8.05      | 1.31   |
| Benzyl acetate                | 0.42 $\pm$ 0.02               | 1.73 $\pm$ 0.09  | 3.04 $\pm$ 0.30  | 173.28 $\pm$ 3.36                                       | 19.70 $\pm$ 0.36 | 5.95 $\pm$ 0.13 | 413.76               | 11.40     | 1.96   |
